# Supplementary material for: Argon attenuates the emergence of secondary injury after traumatic brain injury within a 2-hour incubation period compared to desflurane: an in vitro study
Source: PubMed Central journal article supplement — Med Gas Res. 2017 Jun 30;7(2):93–100. doi: 10.4103/2045-9912.208512 (PMC5510299; doi:10.4103/2045-9912.208512), 2017-06-30
Supplement: MGR-7-93_Suppl1.pdf [file MGR-7-93_Suppl1.pdf]

**Additional Table 1: Different media used for culturing of the slices**

| Content                                                                                                                                                                          | PM      | GM      | EM      |
|----------------------------------------------------------------------------------------------------------------------------------------------------------------------------------|---------|---------|---------|
| Gey's balanced salt solution (Sigma-Aldrich, Munich, Germany)                                                                                                                    | 100%    |         |         |
| Eagle minimal essential medium with Earle's salts (Sigma-Aldrich)                                                                                                                |         | 50%     | 75%     |
| Hank's balanced salt solution (Sigma-Aldrich)                                                                                                                                    |         | 25%     | 25%     |
| Heat inactive horse serum (Sigma-Aldrich)                                                                                                                                        |         | 25%     |         |
| D-(+)Glucose (Roth, Karlsruhe, Germany)                                                                                                                                          | 5 mg/mL | 5 mg/mL | 5 mg/mL |
| 1 Vol.% antibiotic/ antimycotic solution: penicillin G GIBCO™<br>10,000 units/mL, streptomycin sulphate 10 mg/mL, amphotericin B<br>25 µg/mL (Thermo Fisher Scientific, MA, USA) |         | x       | x       |
| L-Glutamine solution (Sigma-Aldrich)                                                                                                                                             |         | x       | x       |
| HEPES buffer solution (Sigma-Aldrich)                                                                                                                                            |         | x       | x       |
| Propidium iodide (Sigma Aldrich)                                                                                                                                                 |         |         | 3 µL/mL |

Note: Three different kinds of media were used in the experiment. First, the pups' heads were cut off with scissors, followed by the rapid removal of the brains and the direct immersion into an ice-cold preparation medium (PM). Further preparation was performed before the hippocampal slices were arranged onto the membrane of a MilliCell tissue culture insert (MilliCell-CM, Millipore Corporation, Billerica, MA, USA). The inserts were then placed in tissue culture plates and a growth medium (GM) was placed underneath the tissue culture insert. For the experiment, an experimental medium (EM) containing propidium iodide was used.
