# Supplementary material for: Argon attenuates the emergence of secondary injury after traumatic brain injury within a 2-hour incubation period compared to desflurane: an in vitro study
Source: PubMed Central journal article supplement — Med Gas Res. 2017 Jun 30;7(2):93–100. doi: 10.4103/2045-9912.208512 (PMC5510299; doi:10.4103/2045-9912.208512), 2017-06-30
Supplement: MGR-7-93_Suppl2.pdf [file MGR-7-93_Suppl2.pdf]

**Additional Table 2: Groups according to the protocol**

| Group   | Incubation time | Incubator atmosphere                                                                   | Traumatic brain injury |
|---------|-----------------|----------------------------------------------------------------------------------------|------------------------|
| Group 1 | 2 hours         | Standard atmosphere, no atmospheric intervention                                       |                        |
| Group 2 | 2 hours         | Argon 50%, CO <sub>2</sub> 5%, O <sub>2</sub> 21%, N <sub>2</sub> 24%                  |                        |
| Group 3 | 2 hours         | Desflurane 6% in Argon 50%, CO <sub>2</sub> 5%, O <sub>2</sub> 21%, N <sub>2</sub> 24% |                        |
| Group 4 | 2 hours         | Desflurane 6% in CO <sub>2</sub> 5%, O <sub>2</sub> 21%, N <sub>2</sub> 74%            |                        |
| Group 5 | 2 hours         | Standard atmosphere, no atmospheric intervention                                       | x                      |
| Group 6 | 2 hours         | Argon 50%, CO <sub>2</sub> 5%, O <sub>2</sub> 21%, N <sub>2</sub> 24%                  | x                      |
| Group 7 | 2 hours         | Desflurane 6% in Argon 50%, CO <sub>2</sub> 5%, O <sub>2</sub> 21%, N <sub>2</sub> 24% | x                      |
| Group 8 | 2 hours         | Desflurane 6% in CO <sub>2</sub> 5%, O <sub>2</sub> 21%, N <sub>2</sub> 74%            | x                      |
